# Supplementary material for: Coexistence of understory tree species via architecture differentiation in the Atlantic Forest of southern Brazil
Source: Research Square preprint supplement (doi:10.21203/rs.3.rs-7934892/v1), 2025-11-19

**Supplementary Information**


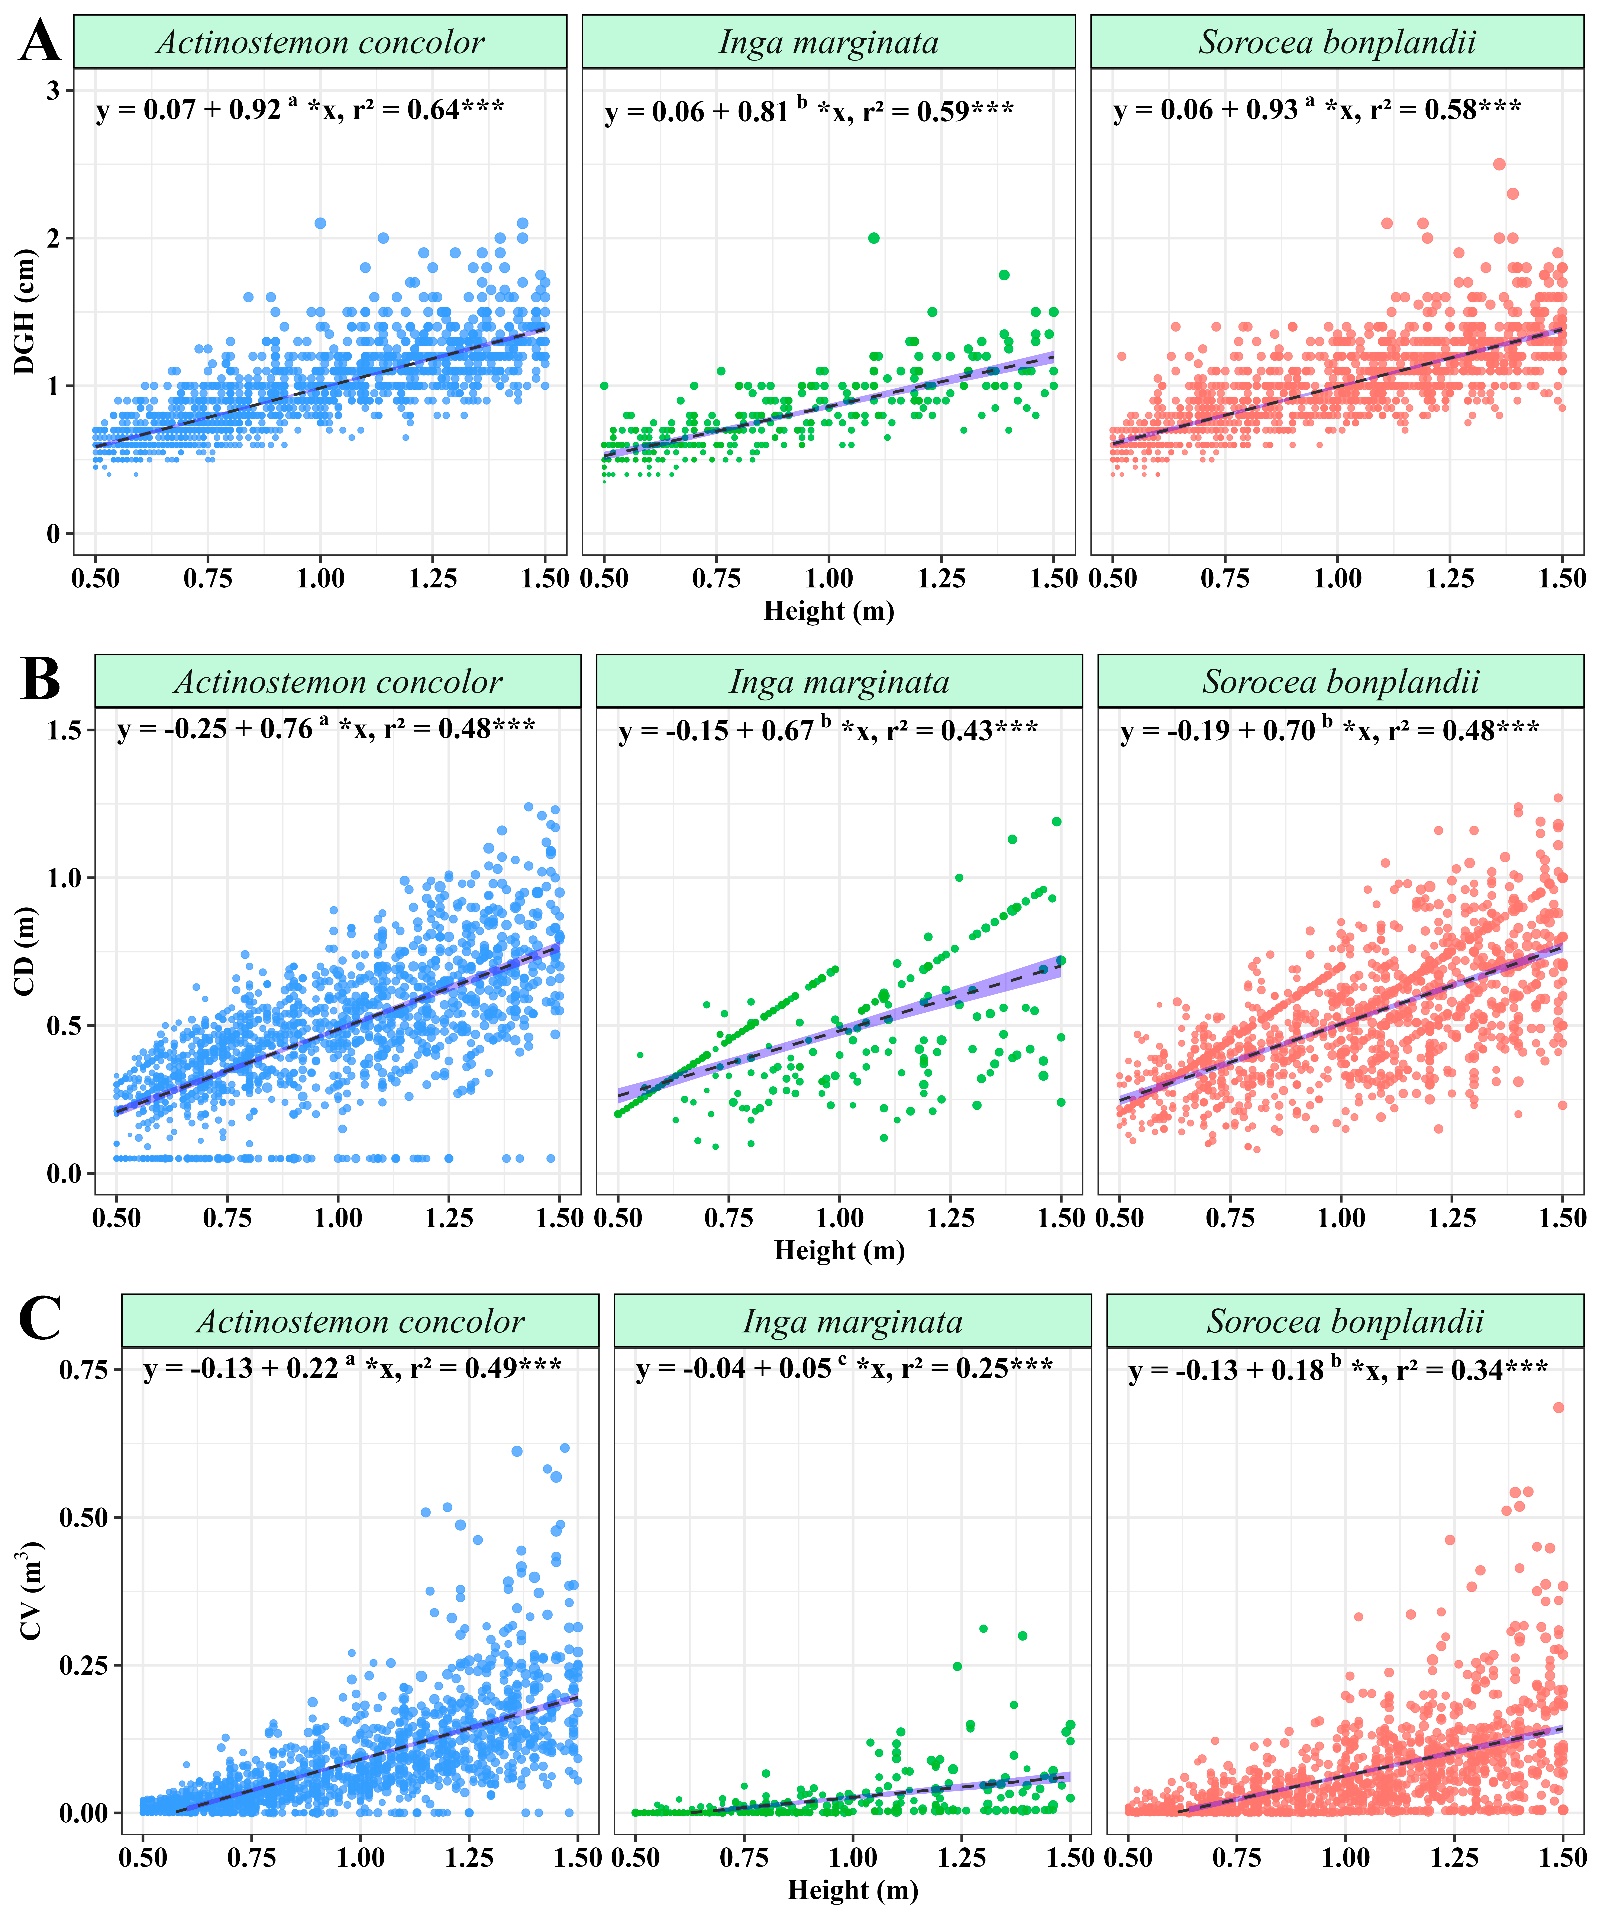


**Figure S1.** Allometric relationships for the first height class (H1 = 0.5 ≥ H ≤ 1.5 m) of the three species (*Actinostemon concolor*, *Inga marginata* and *Sorocea bonplandii*) sampled in Mata São Francisco State Park (SFFSP). The allometric relationships were followed by: A = DGH × Height; B = CD × Height; C = CV × Height. DGH = diameter at ground height (cm); CD = crown depth (m) CV = crown volume (m3).


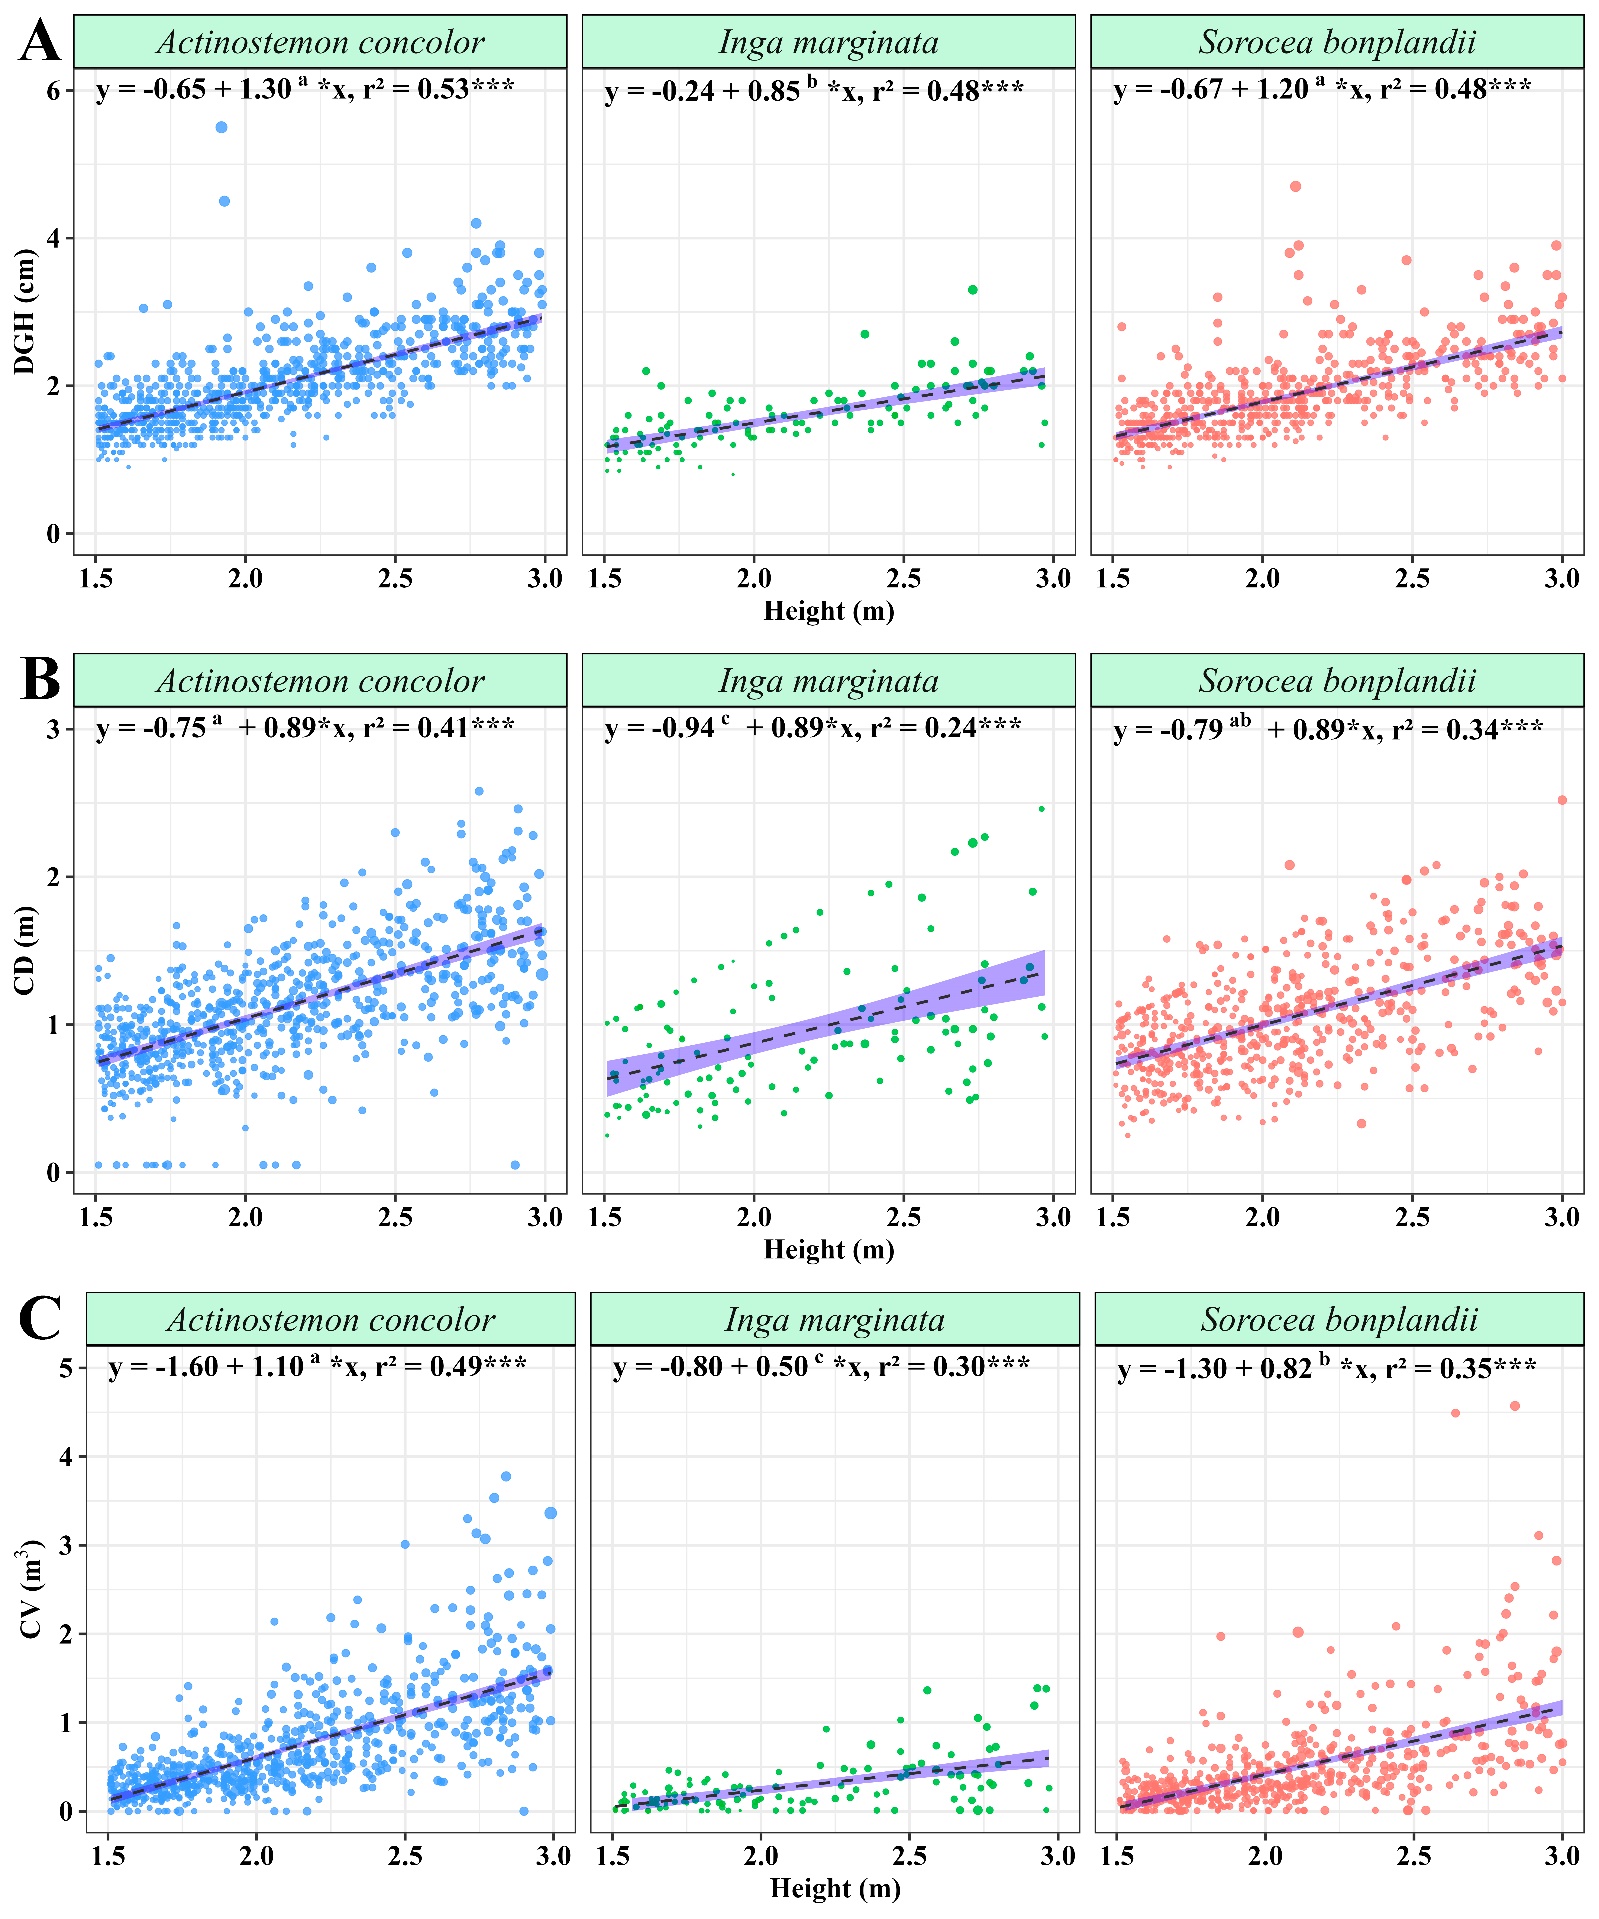


**Figure S2.** Allometric relationships for the second height class (H2 = 1.5 > H ≤ 3.0 m) of the three species (*Actinostemon concolor*, *Inga marginata* and *Sorocea bonplandii*) sampled in Mata São Francisco State Park (SSFSP). The allometric relationships were followed by: A = DGH × Height; B = CD × Height; C = CV × Height. DGH = diameter at ground height (cm); CD = crown depth (m) CV = crown volume (m3).


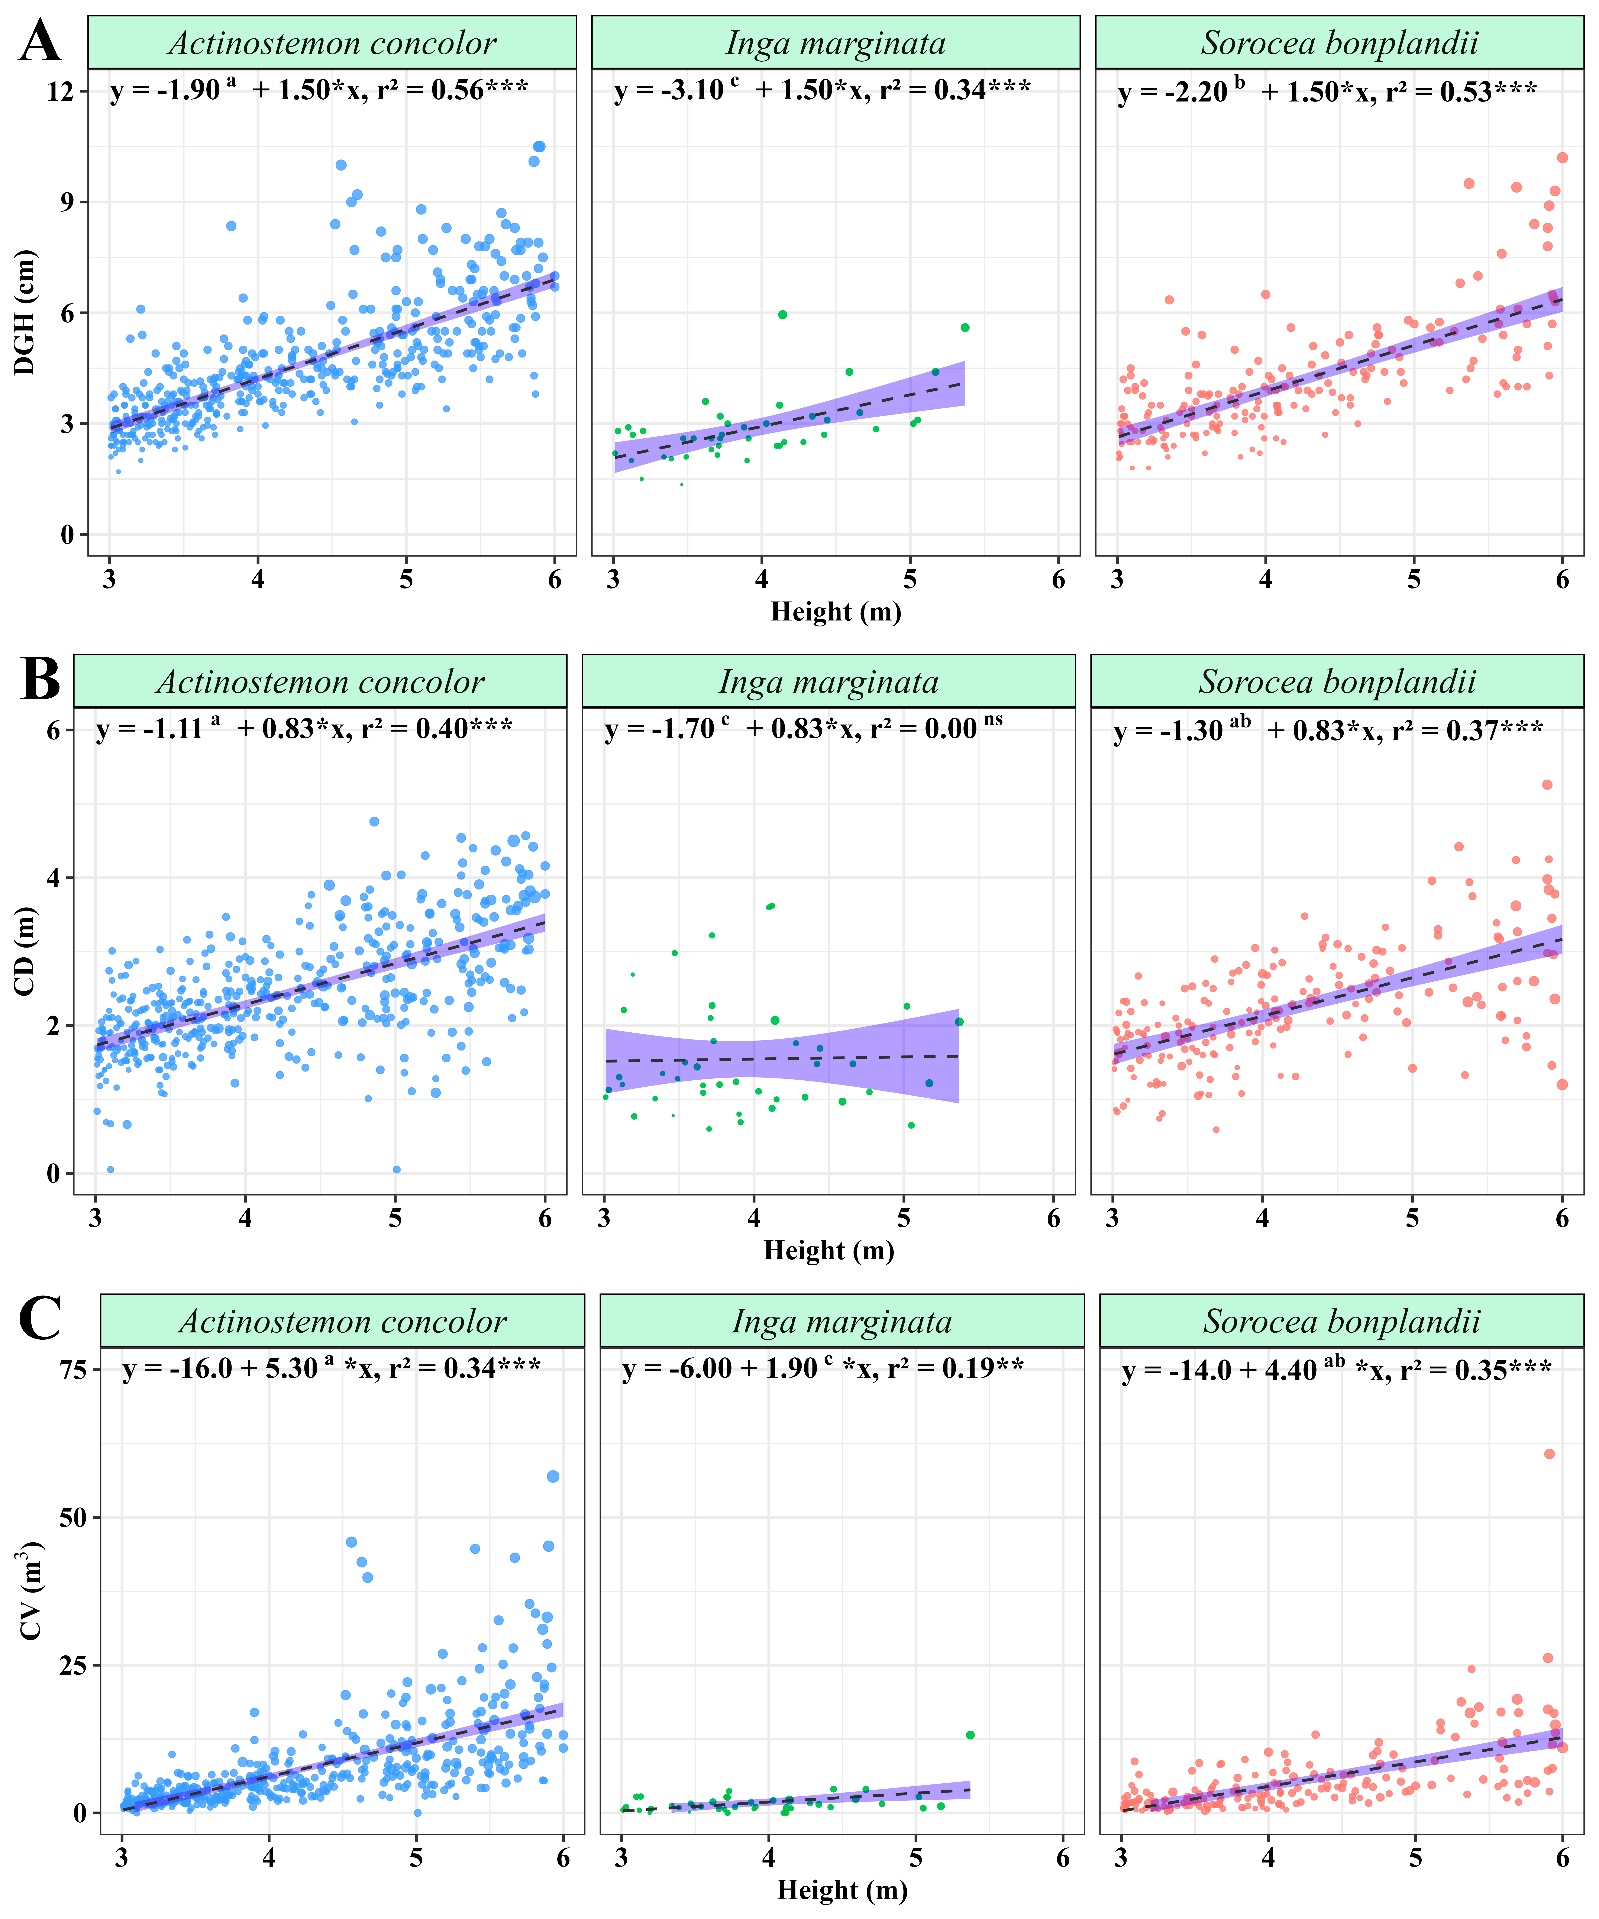


**Figure S3.** Allometric relationships for the third height class (H3 = 3.0 > H ≤ 6.0 m) of the three species (*Actinostemon concolor*, *Inga marginata* and *Sorocea bonplandii*) sampled in Mata São Francisco State Park (SSFSP). The allometric relationships were followed by: A = DGH × Height; B = CD × Height; C = CV × Height. DGH = diameter at ground height (cm); CD = crown depth (m) CV = crown volume (m3).


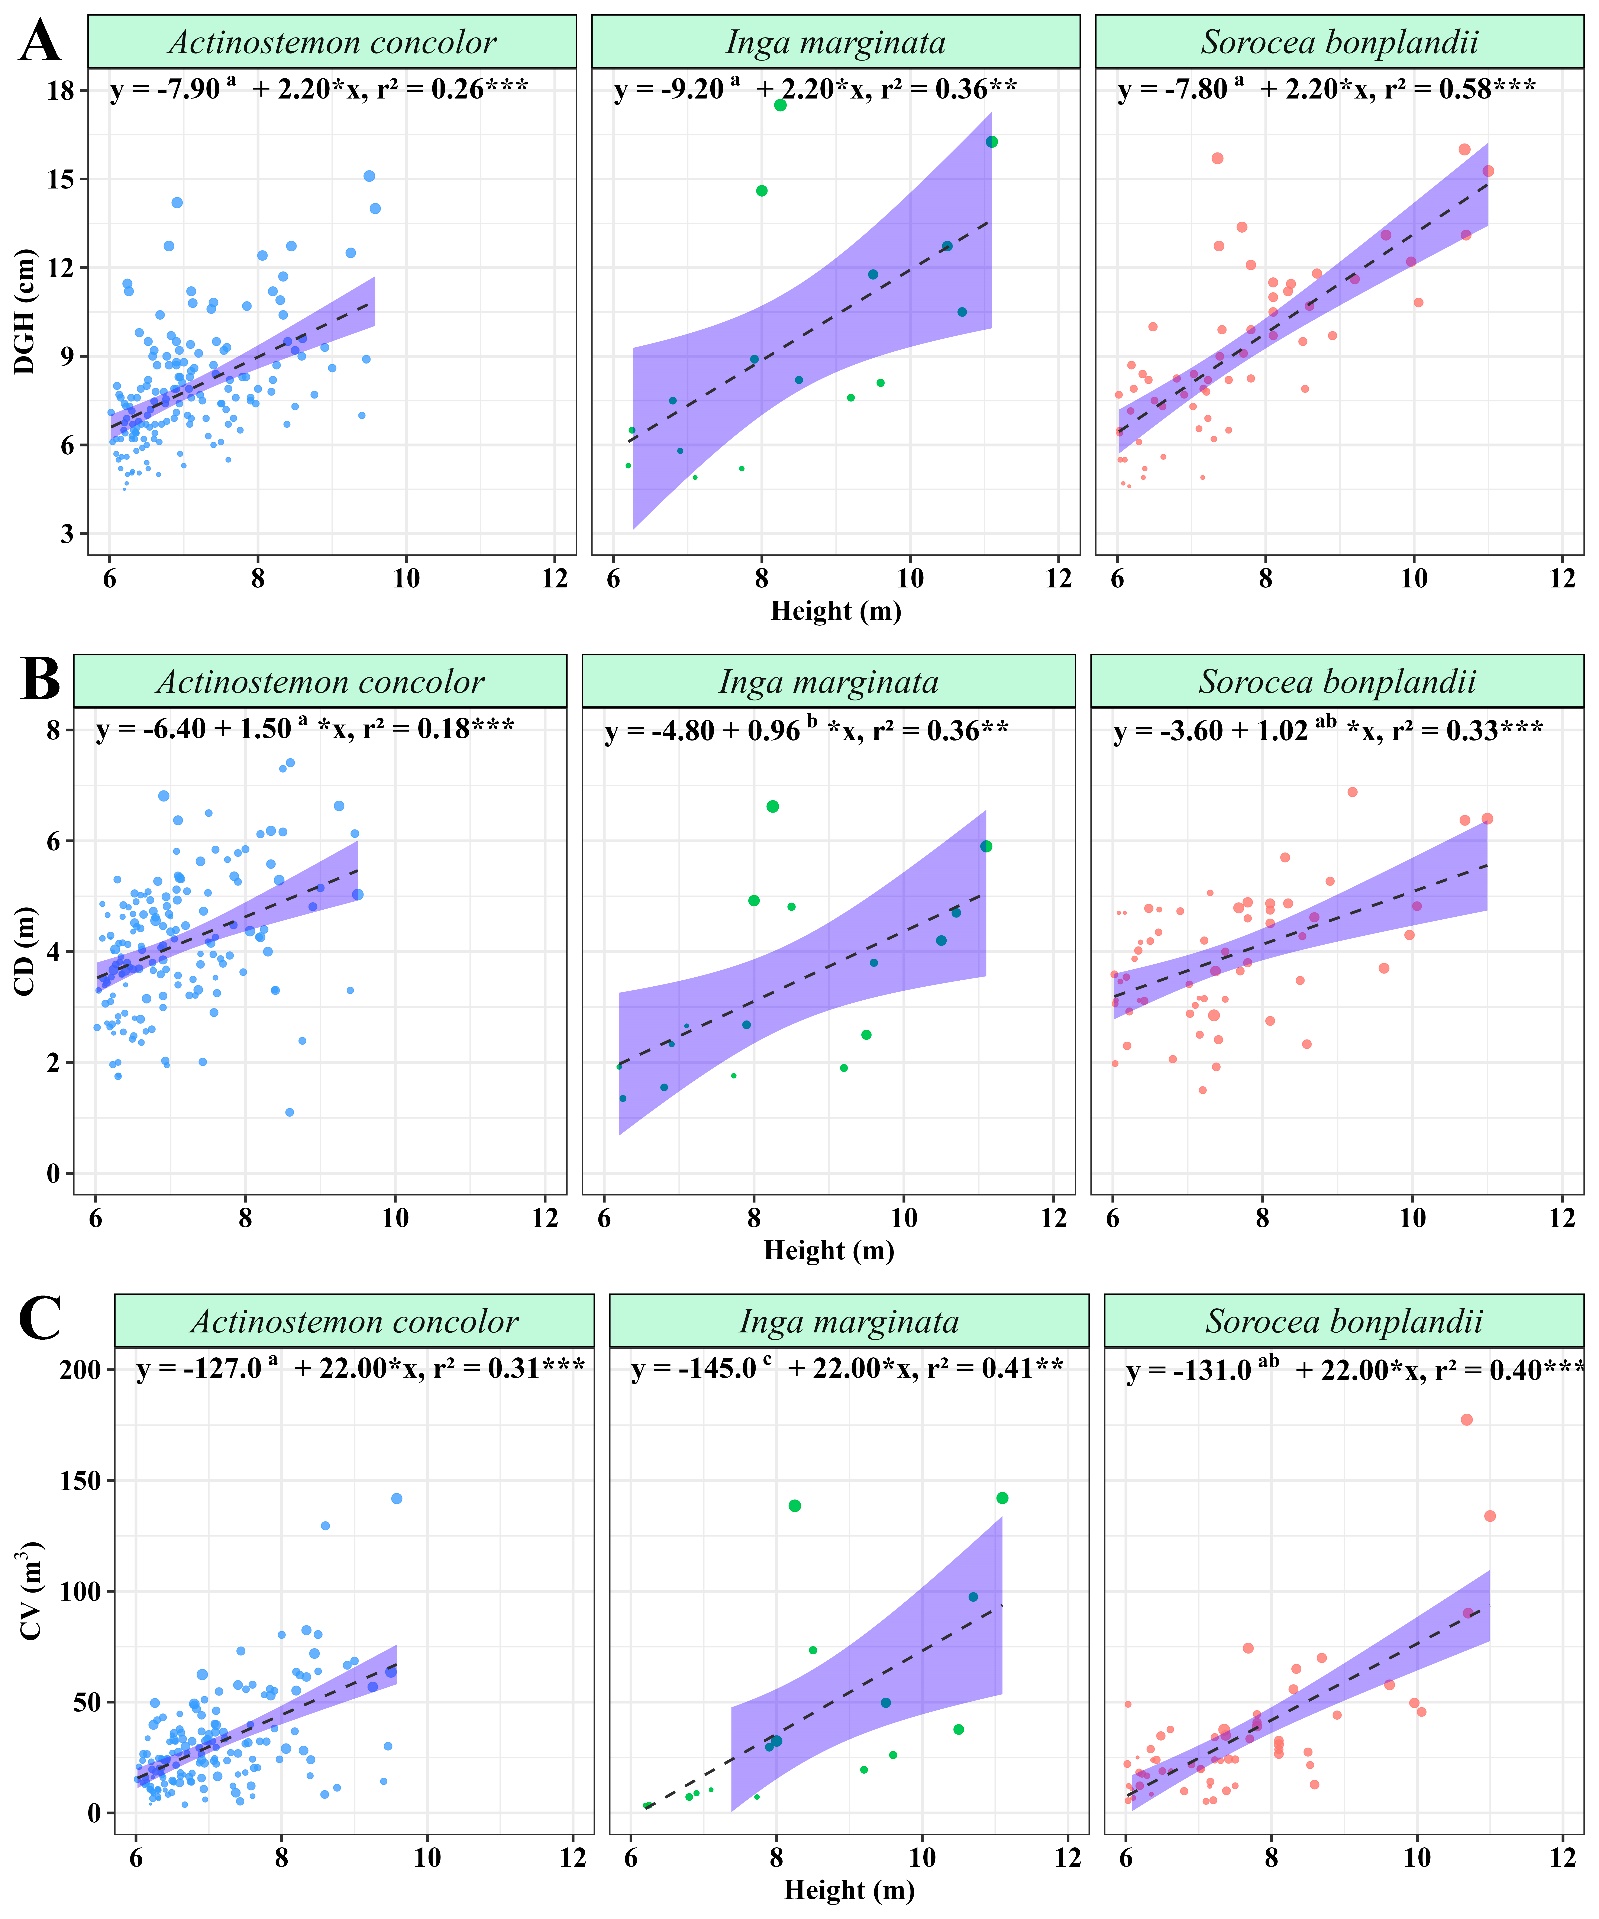


**Figure S4.** Allometric relationships for the fourth height class (H4 = H > 6.0 m) of the three species (*Actinostemon concolor*, *Inga marginata* and *Sorocea bonplandii*) sampled in Mata São Francisco State Park (MSFSP). The allometric relationships were followed by: A = DGH × Height; B = CD × Height; C = CV × Height. DGH = diameter at ground height (cm); CD = crown depth (m) CV = crown volume (m3).

**Table S1.** Summary of number of individuals divided by height classes. N = number of individuals. First height class (H1 = 0.5 ≥ H ≤ 1.5 m); second height class (H2 = 1.5 > H ≤ 3.0 m); Third height class (H3 = 3.0 > H ≤ 6.0 m); Fourth height class (H4 = H > 6.0 m).

|  | Number of Individuals divided by height classes | | | | |
| --- | --- | --- | --- | --- | --- |
|  | **First Class**  N = 31951 | **Second Class**  N = 14491 | **Third Class**  N = 7031 | **Fourth Class**  N = 2321 | |
| **Species** |  |  |  |  | |
| *Actinostemon concolor* | 1529 (47.86%) | 753 (51.97%) | 462 (65.72%) | 157 (67.67%) | |
| *Inga marginata* | 331 (10.36%) | 120 (8.282%) | 42 (5.974%) | 16 (6.897%) | |
| *Sorocea bonplandii* | 1335 (41.78%) | 576 (39.75%) | 199 (28.31%) | 59 (25.43%) | |
| 1n (%). | | | | |

**Table S2.** Summary of the forest stand data. Range and number of stems per hectare (trees ha-1) for each species sampled in Mata São Francisco State Park (MSFSP). (AC – *Actinostemon concolor*; IM – *Inga marginata*; SB – *Sorocea bonplandii*). H = height (m); DGH = diameter at ground height (cm); CD = crown depth (m); HCA = horizontal crown area (m2); VCA, vertical crown area (m2); CV = crown volume (m3).

| Species | Range | | | | Trees ha–1 |
| --- | --- | --- | --- | --- | --- |
|  | H (m) | DGH (cm) | CD (m) | CV (m3) |  |
| AC | 0.5–9.58 | 0.4–15.1 | 0.05–8.14 | 0.0003–141.84 | 2417.50 |
| IM | 0.5–11.10 | 0.35–17.5 | 0.09–6.62 | 0.0003–142.07 | 424.50 |
| SB | 0.5–11.0 | 0.4–16.0 | 0.08–8.24 | 0.0003–259.07 | 1807.50 |

**Table S3.** Summary of the forest stand data. Mean of architectural variables for each species sampled in Mata São Francisco State Park (MSFSP). (AC – *Actinostemon concolor*; IM – *Inga marginata*; SB – *Sorocea bonplandii*). SD = Standard deviation; H = Height (m); DGH = Diameter at ground height (cm); CD = Crown depth (m); HCA = Horizontal crown area (m2); VCA, Vertical crown area (m2); CV = Crown volume (m3).

| Species | Mean ± SD | | | |
| --- | --- | --- | --- | --- |
|  | H (m) | DGH (cm) | CD (m) | CV (m3) |
| AC | 2.09 ± 1.73 | 2.16 ± 2.06 | 1.13 ± 1.11 | 3.09 ± 9.49 |
| IM | 1.65 ± 1.58 | 1.41 ± 1.76 | 0.73 ± 0.74 | 1.57 ± 10.92 |
| SB | 1.74 ± 1.42 | 1.71 ± 1.68 | 0.89 ± 0.82 | 1.64 ± 9.34 |

**Figure S5**: Path diagram shows the correlation between crown traits, total height, stem diameter, growth and survival. Single-headed arrows refer to causal relationships; double-headed arrows to correlations. This Path diagram is adapted from Sterck et al. (2003). DGH = diameter at ground height (cm); H = height (m); CD = crown depth (m); HCA = horizontal crown area (m2); VCA, vertical crown area (m2); CV = crown volume (m3).


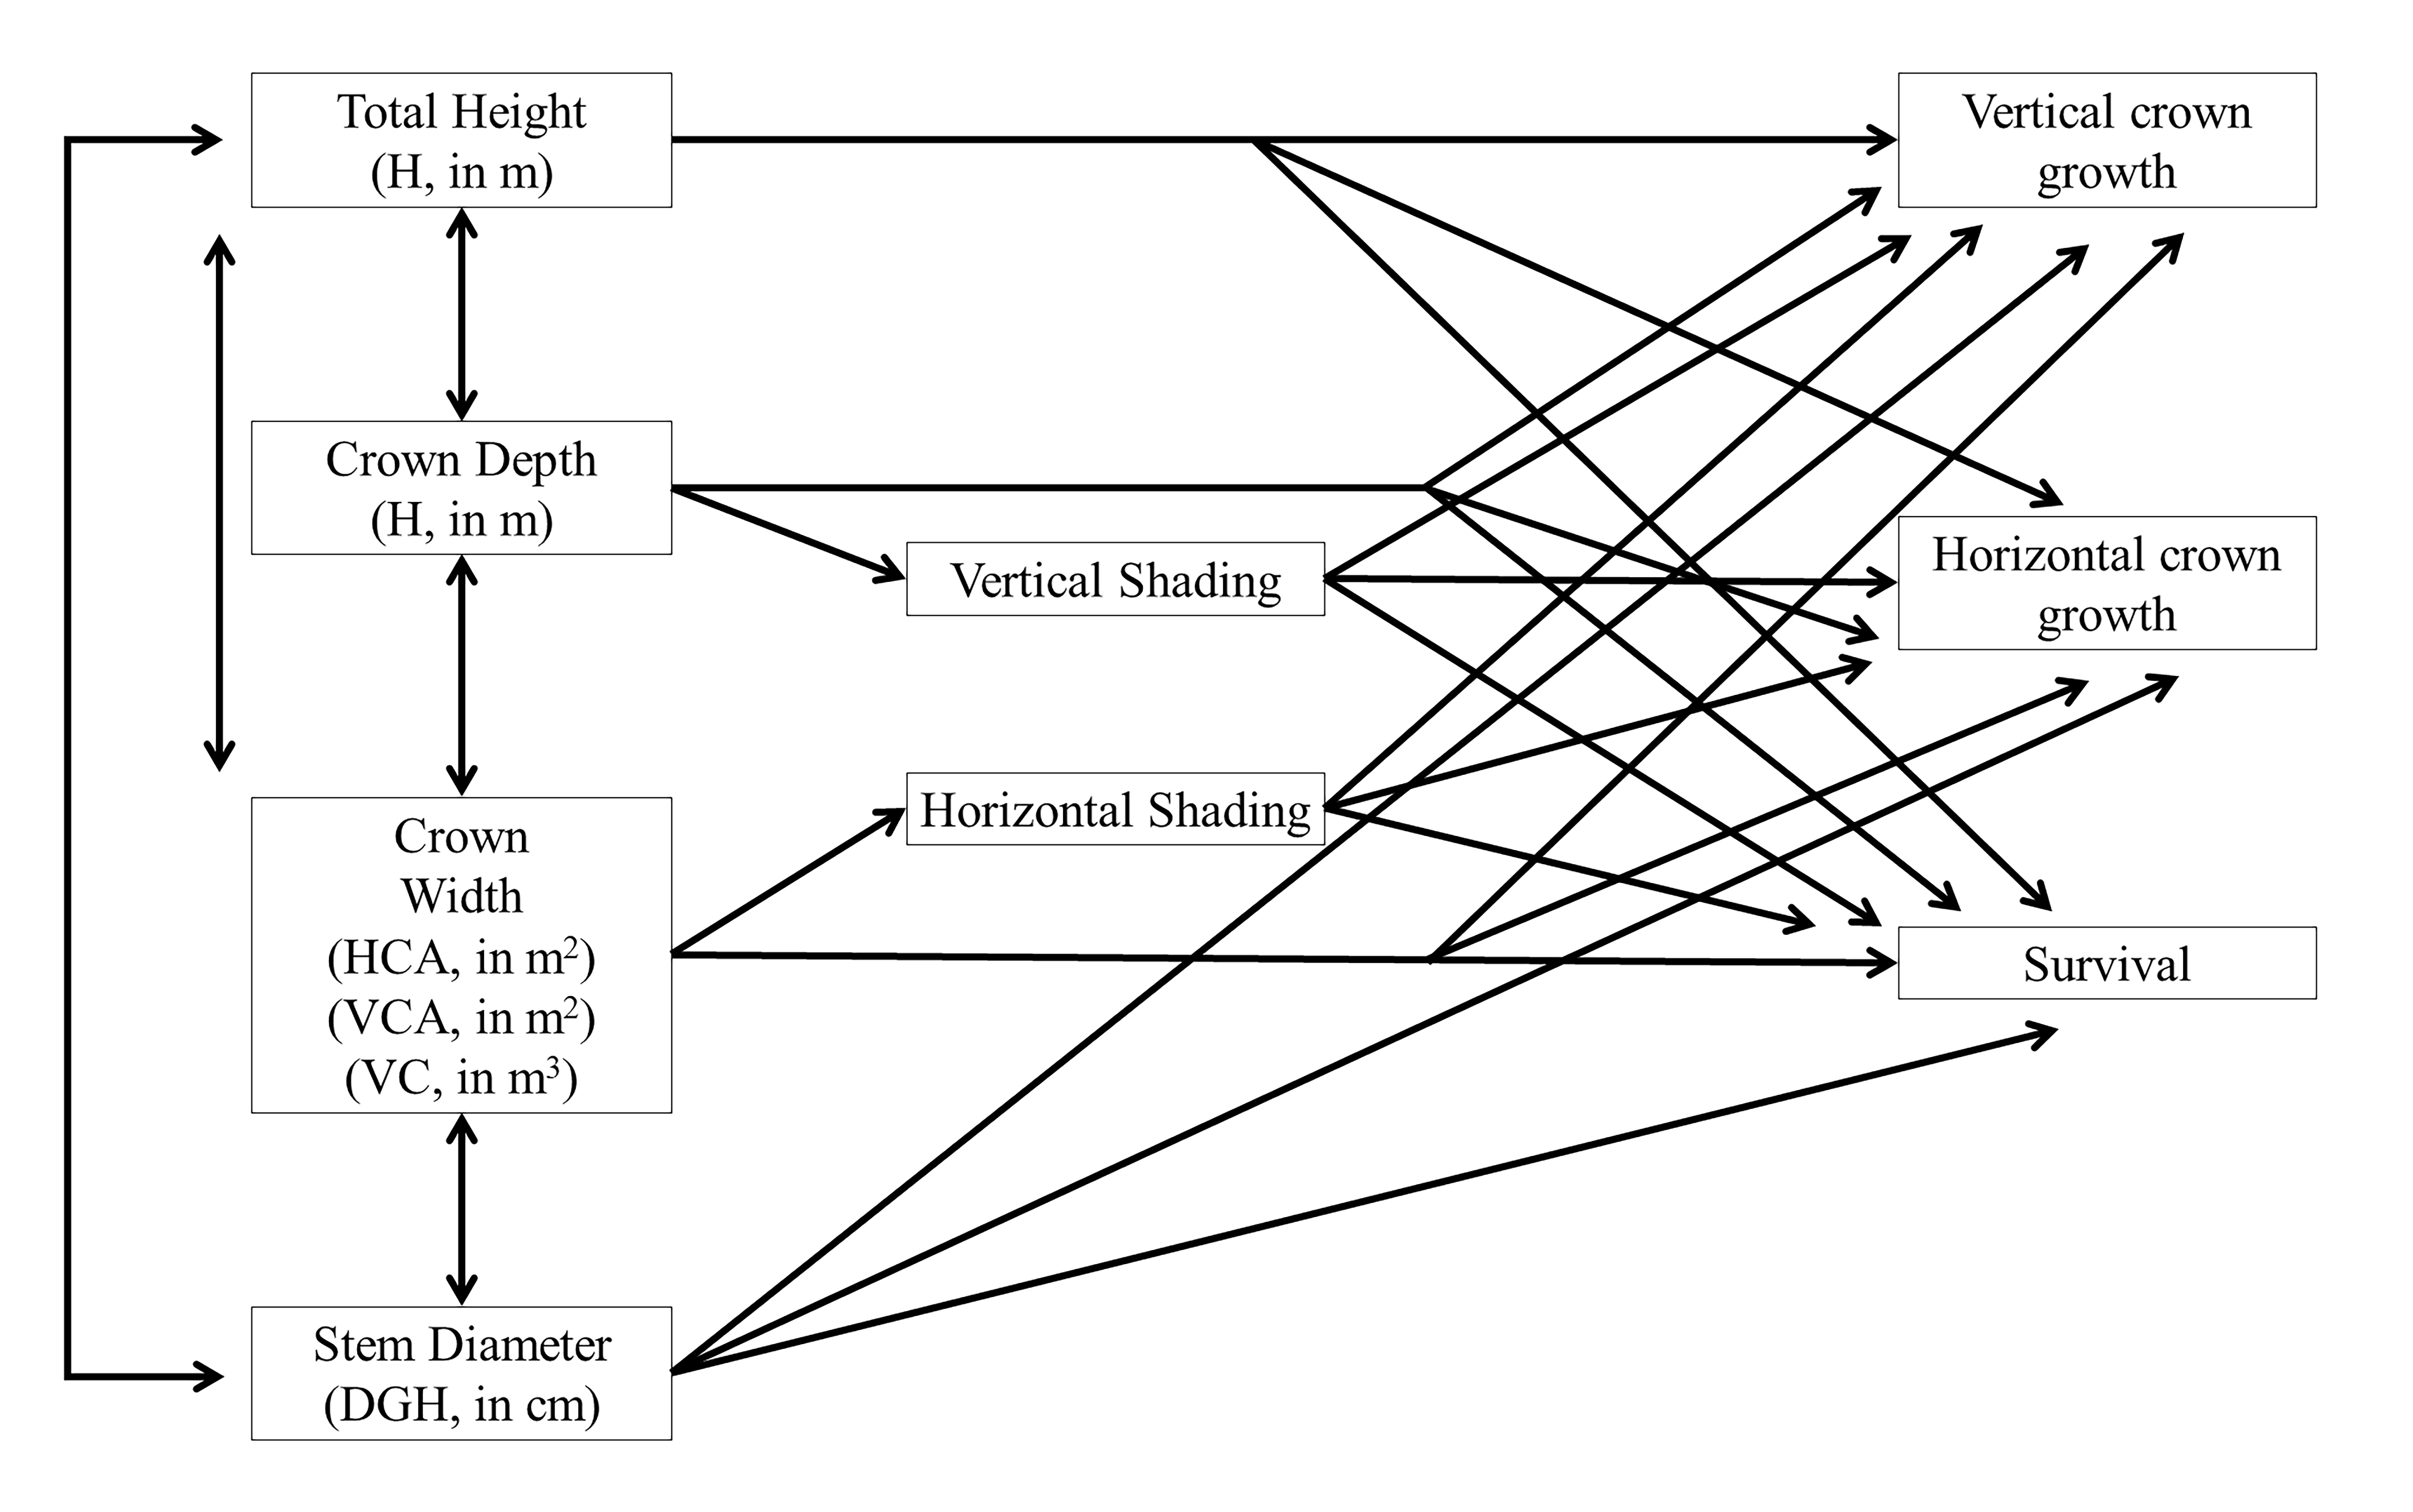

Supplement: Supplementary file 1 [file 167171cb312e008f0f36b0d8.docx]
